# Supplementary material for: Radiation-Induced DNMT3B Promotes Radioresistance in Nasopharyngeal Carcinoma through Methylation of p53 and p21
Source: PubMed Central journal article supplement — Mol Ther Oncolytics. 2020 Apr 21;17:306–19. doi: 10.1016/j.omto.2020.04.007 (PMC7200625; doi:10.1016/j.omto.2020.04.007), 2020-04-21
Supplement: mmc1.pdf [file mmc1.pdf]

**OMTO, Volume 17**

**Supplemental Information**

**Radiation-Induced DNMT3B Promotes**

**Radioresistance in Nasopharyngeal Carcinoma**

**through Methylation of p53 and p21**

**Cheng Wu, Ergang Guo, Jun Ming, Wei Sun, Xin Nie, Lu Sun, Shan Peng, Min Luo, Dongbo Liu, Linli Zhang, Qi Mei, Guoxian Long, Guangyuan Hu, and Guoqing Hu**

Supplemental Information

**Radiation-induced DNMT3B promotes radioresistance in nasopharyngeal carcinoma through methylation of p53 and p21**

Cheng Wu, Ergang Guo, Jun Ming, Wei Sun, Xin Nie, Lu Sun, Shan Peng, Min Luo, Dongbo Liu,  
Linli Zhang, Qi Mei, Guoxian Long, Guangyuan Hu, Guoqing Hu

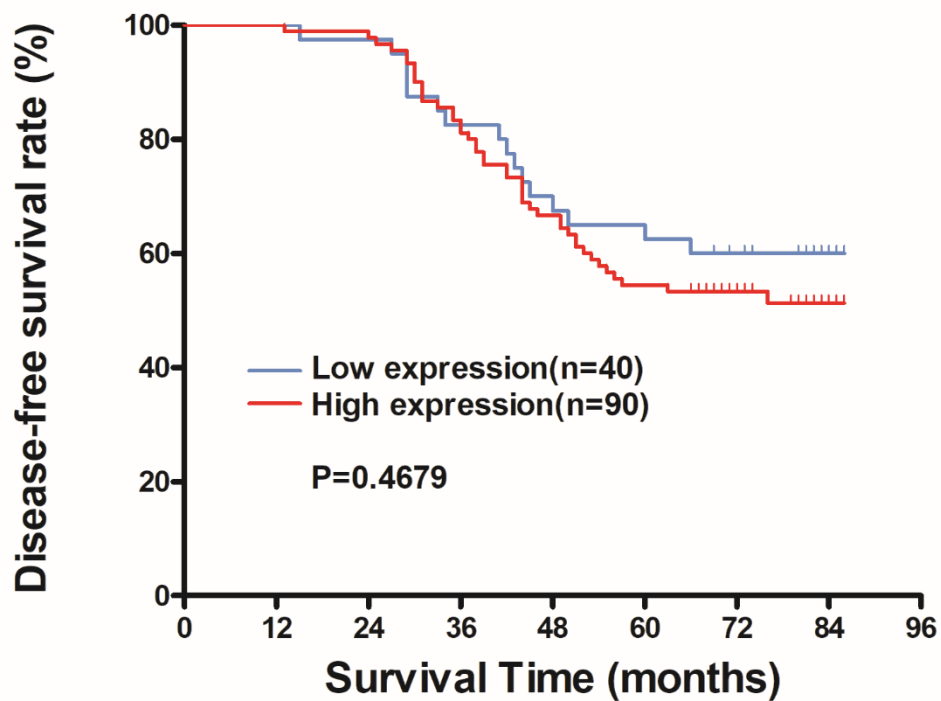

**Fig. S1 DNMT3B expression is not related to disease-free survival in NPC patients.** Kaplan-Meier disease-free survival curves for all 130 patients with NPC stratified by high (n=90) versus low (n=40) expression level of DNMT3B. P-value was calculated using the log-rank test.

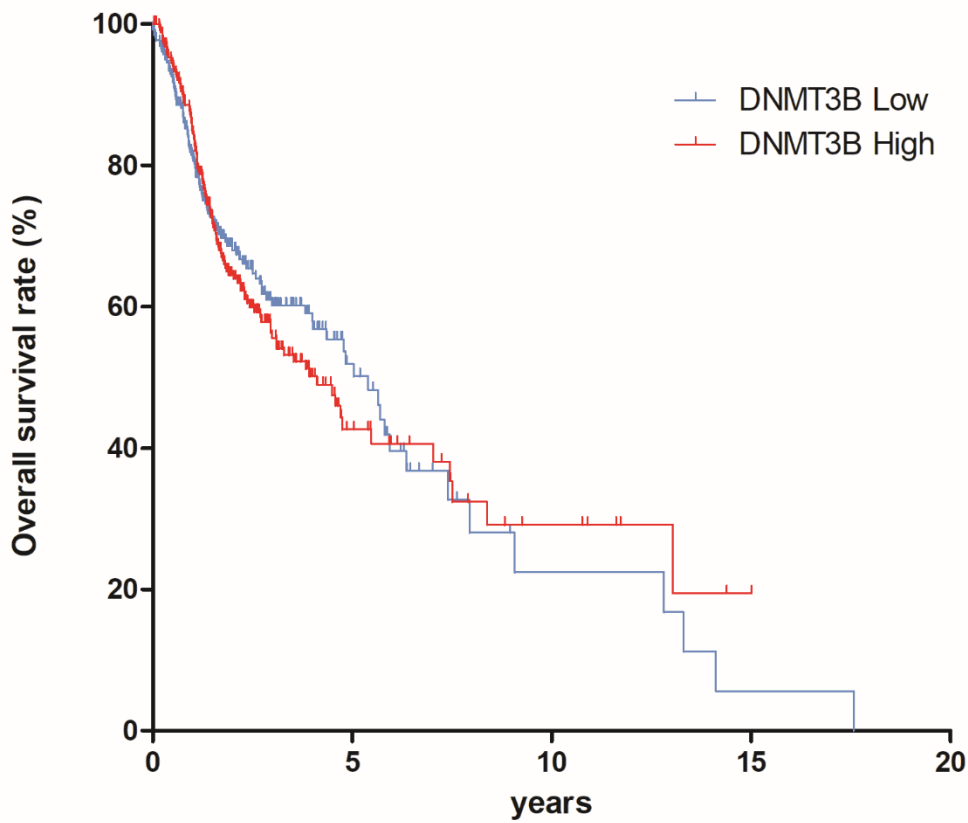

**Fig. S2 DNMT3B expression is not related to overall survival in HNSCC patients from TCGA database (P=0.7246).** Kaplan-Meier overall survival curves for all 518 patients with HNSCC stratified by high versus low expression level of DNMT3B. P-value was calculated using the log-rank test.

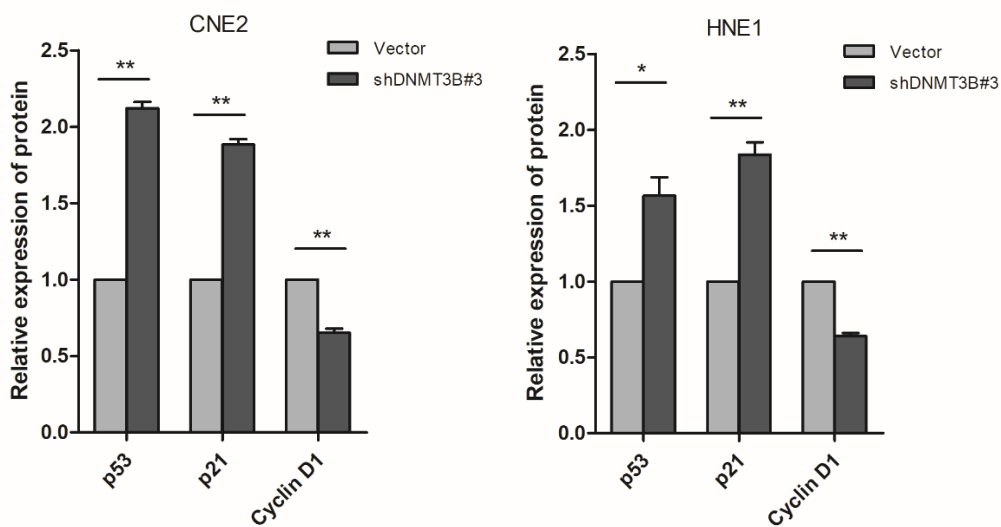

**Fig.S3 Protein quantification for p53, p21 and Cyclin D1 in CNE2 and HNE1 cell lines transfected with shDNMT3B and vector.**

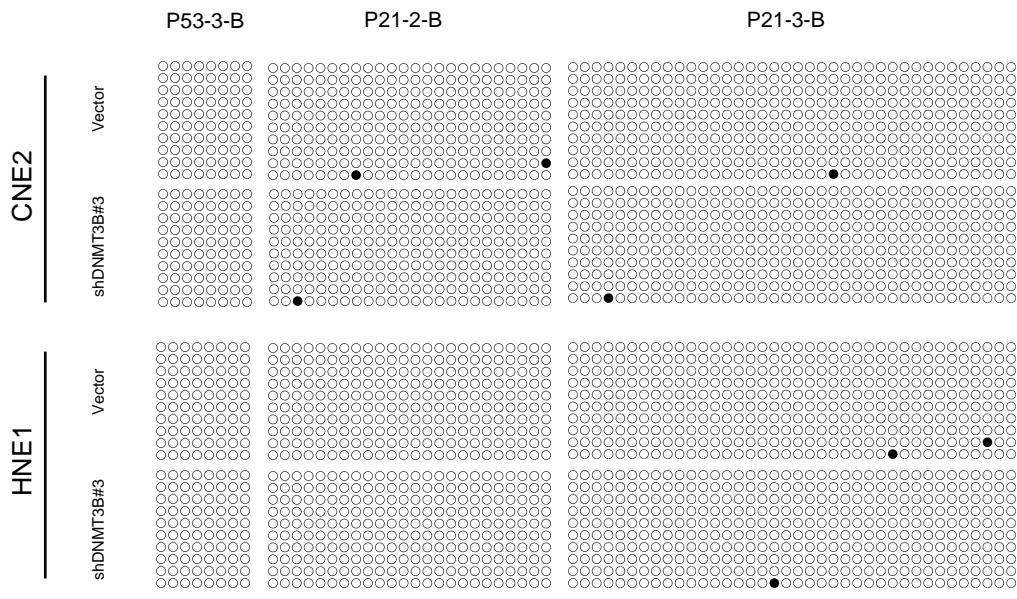

**Fig.S4 Bisulfite sequencing PCR results of promoter of p53 and p21 with primers (P53-3-B, P21-2-B, P21-3-B).**

**Table S1. 40 paired samples with detailed information from TCGA (HNSCC).**

| Serial number | bcr_patient_bar code | clinical_stage | form_completion_date | anatomic_neoplasm_subdivision | gender |
|---------------|----------------------|----------------|----------------------|-------------------------------|--------|
| 1             | TCGA-CV-7091         | Stage I        | 2011/10/11           | Oral Cavity                   | MALE   |
| 2             | TCGA-CV-7177         | Stage I        | 2011/10/11           | Larynx                        | FEMALE |
| 3             | TCGA-CV-6938         | Stage II       | 2011/9/13            | Oral Cavity                   | MALE   |
| 4             | TCGA-CV-6961         | Stage II       | 2011/9/12            | Oral Tongue                   | MALE   |
| 5             | TCGA-CV-6955         | Stage II       | 2011/10/11           | Oral Cavity                   | FEMALE |
| 6             | TCGA-CV-7101         | Stage II       | 2011/10/6            | Larynx                        | MALE   |
| 7             | TCGA-CV-7103         | Stage II       | 2011/10/11           | Oral Tongue                   | MALE   |
| 8             | TCGA-CV-7183         | Stage II       | 2011/10/11           | Oral Cavity                   | MALE   |
| 9             | TCGA-CV-7238         | Stage II       | 2011/12/5            | Oral Tongue                   | FEMALE |
| 10            | TCGA-CV-7255         | Stage II       | 2011/12/5            | Oral Tongue                   | FEMALE |
| 11            | TCGA-CV-7406         | Stage II       | 2012/4/9             | Base of tongue                | MALE   |
| 12            | TCGA-CV-7423         | Stage II       | 2012/2/13            | Oral Cavity                   | MALE   |
| 13            | TCGA-CV-7437         | Stage II       | 2012/4/9             | Larynx                        | MALE   |
| 14            | TCGA-CV-7438         | Stage II       | 2012/2/13            | Oral Tongue                   | FEMALE |
| 15            | TCGA-CV-7440         | Stage II       | 2012/4/9             | Larynx                        | MALE   |
| 16            | TCGA-CV-6935         | Stage III      | 2011/9/9             | Larynx                        | MALE   |
| 17            | TCGA-CV-6943         | Stage III      | 2011/9/9             | Base of tongue                | MALE   |
| 18            | TCGA-CV-6959         | Stage III      | 2011/9/8             | Oral Tongue                   | MALE   |
| 19            | TCGA-CV-6962         | Stage III      | 2011/8/25            | Larynx                        | MALE   |
| 20            | TCGA-CV-6960         | Stage III      | 2011/9/8             | Oral Cavity                   | MALE   |
| 21            | TCGA-CV-7097         | Stage III      | 2011/10/5            | Oral Cavity                   | MALE   |
| 22            | TCGA-CV-7235         | Stage III      | 2011/12/12           | Floor of mouth                | MALE   |
| 23            | TCGA-CV-7242         | Stage III      | 2011/12/2            | Larynx                        | FEMALE |
| 24            | TCGA-CV-7245         | Stage III      | 2011/12/2            | Larynx                        | MALE   |
| 25            | TCGA-CV-7250         | Stage III      | 2011/12/5            | Larynx                        | MALE   |
| 26            | TCGA-CV-7252         | Stage III      | 2011/12/2            | Oral Cavity                   | FEMALE |
| 27            | TCGA-CV-7261         | Stage III      | 2011/12/2            | Larynx                        | MALE   |
| 28            | TCGA-CV-7425         | Stage III      | 2012/2/13            | Oral Cavity                   | FEMALE |
| 29            | TCGA-CV-7432         | Stage III      | 2012/2/13            | Oral Cavity                   | MALE   |
| 30            | TCGA-CV-7434         | Stage III      | 2012/2/13            | Oral Cavity                   | MALE   |
| 31            | TCGA-HD-8635         | Stage III      | 2012/12/28           | Oral Tongue                   | FEMALE |
| 32            | TCGA-HD-A6I0         | Stage III      | 2013/9/20            | Oral Cavity                   | MALE   |
| 33            | TCGA-CV-6933         | Stage IVA      | 2011/9/9             | Oral Tongue                   | MALE   |
| 34            | TCGA-CV-6934         | Stage IVA      | 2011/9/13            | Oral Tongue                   | FEMALE |
| 35            | TCGA-CV-6936         | Stage IVA      | 2011/9/13            | Floor of mouth                | MALE   |
| 36            | TCGA-CV-6939         | Stage IVA      | 2011/9/13            | Oral Tongue                   | MALE   |
| 37            | TCGA-CV-6956         | Stage IVA      | 2011/10/11           | Oral Tongue                   | MALE   |
| 38            | TCGA-CV-7178         | Stage IVA      | 2011/10/11           | Oral Cavity                   | FEMALE |
| 39            | TCGA-CV-7416         | Stage IVA      | 2012/1/31            | Oral Cavity                   | FEMALE |
| 40            | TCGA-CV-7424         | Stage IVA      | 2012/2/7             | Larynx                        | MALE   |

**Table S2. Methylation-specific PCR primers designed for P53 and P21.**

|           |                              |
|-----------|------------------------------|
| P53-1-M-F | ATTATAGGCGCGTGTATTATATGC     |
| P53-1-M-R | AAATCACTTAAAACCAAAAATTCTGA   |
| P53-1-U-F | TATAGGTGTGTGTTATTATATGTGT    |
| P53-1-U-R | AATCACTTAAAACCAAAAATTCAAA    |
| P53-2-M-F | TTCGGTAGGCGGATTATTTG         |
| P53-2-M-R | AAATATCCCCGAAACCCAAC         |
| P53-2-U-F | TTGGTAGGTGGATTATTTGTTT       |
| P53-2-U-R | CCAATCCAAAAAACATATCAC        |
| P53-3-M-F | TTCGGTTTCGTGTATTTTAGTTC      |
| P53-3-M-R | ACCTAAACGTTCAACTTTAAATTCG    |
| P53-3-U-F | GTTTTTGGTTTTGTGTATTTTAGTTT   |
| P53-3-U-R | CTACCTAAACATTCAACTTTAAATTCAA |
| P53-4-M-F | TTTAGTATCGCGGGTCGTTAC        |
| P53-4-M-R | AAAATTACCGCGAAACTCGATA       |
| P53-4-U-F | TTTTTTAGTATTGTGGGTTGTAT      |
| P53-4-U-R | AAAATTACCACAAAACCTCAATAAAA   |
| P21-1-M-F | TTTTTTATTGTAGGGGTAGTTACGT    |
| P21-1-M-R | CTAAAATAATCCTACAAAATTTCGCT   |
| P21-1-U-F | TTTTTTATTGTAGGGGTAGTTATGT    |
| P21-1-U-R | CTAAAATAATCCTACAAAATTCACT    |
| P21-2-M-F | TACGCGAGGTTTCGGGATC          |
| P21-2-M-R | CCCTAATATACAACCGCCCCG        |
| P21-2-U-F | GGATTGGTTGGTTTGTGGAATTT      |
| P21-2-U-R | ACAACCCTAATATACAACCACCCCA    |
| P21-3-M-F | GTGTTTTTGC GTGTTTCGC         |
| P21-3-M-R | CGTATACGCAAACCGAACG          |
| P21-3-U-F | GTGTGTTTTTGTGTGTTTGT         |
| P21-3-U-R | ACCATATACACAAACCAAACA        |
| P21-4-M-F | CGGATTCGTCGAGGTATC           |
| P21-4-M-R | ACGCGAACACGCTTAACT           |
| P21-4-U-F | GTGGATTTGTTGAGGTATT          |
| P21-4-U-R | CACACAAACACACTTAACT          |

**Table S3. Bisulfite sequencing PCR primers designed for P53 and P21.**

|           |                               |
|-----------|-------------------------------|
| P53-1-B-F | TTAGTTATATAAGTAGTTGGGATTATAGG |
| P53-1-B-R | CAAAAAAACCCTACATAATAACTCAC    |
| P53-2-B-F | TTTAATTTTATTTTTTTTGTTTTTTT    |
| P53-2-B-R | AAACTTACCCAATCCAAAAAAC        |
| P53-3-B-F | TGAATTTGATGAGTTTTTTTTGAG      |
| P53-3-B-R | AAACTCCACTCCTCTACCTAAAC       |
| P53-4-B-F | TTTTTTGAAAGTATTGTGTTTTTTAG    |
| P53-4-B-R | AAAACRATACAAATACTTTAAAAATTACC |
| P21-1-B-F | ATGGTTGTTATGAGTGTGGTTG        |
| P21-1-B-R | CTAAAACATAAATAATCCTACAAAATTC  |
| P21-2-B-F | GGAGGGAAGTGTTTTTTTGTAGTA      |
| P21-2-B-R | CTTCRACAACACTCACACCTCAAC      |
| P21-3-B-F | TAGTTTTTTGTGGAGTYGGAGTTG      |
| P21-3-B-R | CCAAAATTCCTATACTTATAATCCC     |

**Table S4. The primer sequences for real-time PCR analysis.**

|          |                        |
|----------|------------------------|
| GAPDH-F  | GGTCGGAGTCAACGGGTGAG   |
| GAPDH-R  | GGAAGATGGTGATGGGATTTC  |
| DNMT1-F  | CCTAGCCCCAGGATTACAAGG  |
| DNMT1-R  | ACTCATCCGATTTGGCTCTTTC |
| DNMT3A-F | CCGATGCTGGGGACAAGAAT   |
| DNMT3A-R | CCCGTCATCCACCAAGACAC   |
| DNMT3B-F | AGGGAAGACTCGATCCTCGTC  |
| DNMT3B-R | GTGTGTAGCTTAGCAGACTGG  |
| P53-F    | CAGCACATGACGGAGGTTGT   |
| P53-R    | TCATCCAAATACTCCACACGC  |
| P21-F    | CGATGGAACTTCGACTTTGTCA |
| P21-R    | GCACAAGGGTACAAGACAGTG  |

**Table S5. Univariate and multivariate analysis of clinicopathological parameters for the prediction of overall survival in patients with nasopharyngeal carcinoma (n=132).**

| Feature                   | Univariate analysis  |         | Multivariate analysis |         |
|---------------------------|----------------------|---------|-----------------------|---------|
|                           | HR (95%CI)           | P-value | HR (95%CI)            | P-value |
| Age(years)                |                      |         |                       |         |
| < 45                      | 1(Referent)          |         |                       |         |
| ≥45                       | 1.349(0.5799-3.139)  | 0.4869  |                       |         |
| Gender                    |                      |         |                       |         |
| Male                      | 1(Referent)          |         |                       |         |
| Female                    | 1.066 (0.3857-2.947) | 0.9016  |                       |         |
| Histologic classification |                      |         |                       |         |
| U                         | 1(Referent)          |         |                       |         |
| D                         | 0.4643(0.1357-1.589) | 0.2215  |                       |         |
| N category                |                      |         |                       |         |
| N <sub>0</sub>            | 1(Referent)          |         |                       |         |
| N <sub>1-3</sub>          | 3.236(1.277-8.202)   | 0.0133  |                       |         |
| Metastasis                |                      |         |                       |         |
| No                        | 1(Referent)          |         |                       |         |
| Yes                       | 885.6(232.4-3376)    | <0.0001 | 28.703(10.515-78.349) | <0.0001 |
| Clinical stage            |                      |         |                       |         |



|                   |                    |         |
|-------------------|--------------------|---------|
| I+II              | 1(Referent)        |         |
| III+IV            | 7.497(3.209-17.51) | <0.0001 |
| DNMT3B expression |                    |         |
| Low               | 1(Referent)        |         |
| High              | 2.887(1.178-7.076) | 0.0205  |

---

Abbreviations: NPC, nasopharyngeal carcinoma; U, undifferentiated non-keratinized carcinoma; D, differentiated non-keratinized carcinoma; HR, hazard ratio; 95% CI, 95% confidence interval.
